# Supplementary material for: Scorpion Venom Antimicrobial Peptide Derivative BmKn2-T5 Inhibits Enterovirus 71 in the Early Stages of the Viral Life Cycle In Vitro
Source: MDPI journal article supplement (doi:10.3390/biom14050545), 2024-05-01
Supplement: s1 [file s1]

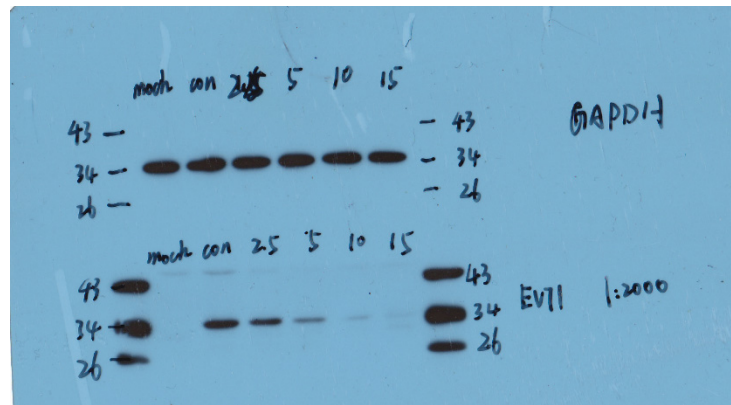

**Figure S1.** Dose-dependent inhibitory effect of BmKn2-T5 on EV71 analyzed using Western blotting (Original image).

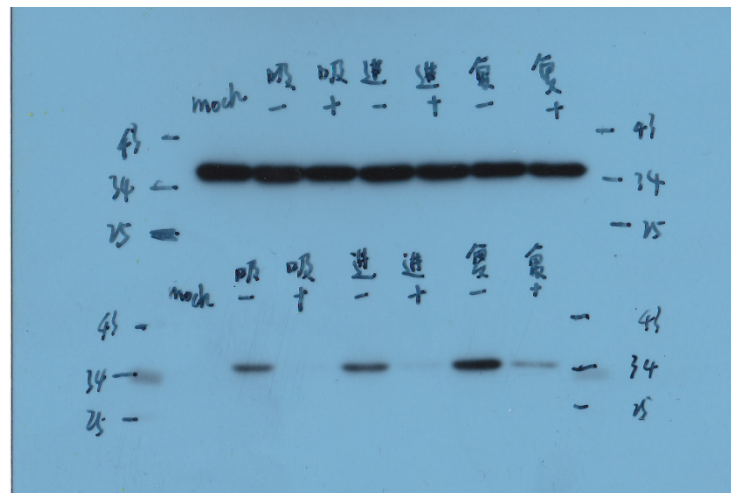

**Figure S2.** EV71 attachment, entry, and replication in RD cells detected using Western blotting (Original image).
